# Supplementary material for: Energy, Sodium, Sugar and Saturated Fat Content of New Zealand Fast-Food Products and Meal Combos in 2020
Source: MDPI journal article supplement (doi:10.3390/nu13114010), 2021-11-10
Supplement: s1 [file s1]

**Supplementary Table S1.** NZ fast food supply 2020, by food category: Minimum and maximum energy, sodium, total sugar and saturated fat content per serving and percentage contribution to recommended daily intakes of energy, sodium, sugar and saturated fat.

| Major and minor fast food category  | N   | Energy- Kilojoules/serving |                                     | Sodium- milligrams/ serving |                                     | Total sugar-grams/serving |                                     | Saturated fat-grams/serving |                                     |
|-------------------------------------|-----|----------------------------|-------------------------------------|-----------------------------|-------------------------------------|---------------------------|-------------------------------------|-----------------------------|-------------------------------------|
|                                     |     | Content                    | Percentage of daily recommendation* | Content                     | Percentage of daily recommendation* | Content                   | Percentage of daily recommendation* | Content                     | Percentage of daily recommendation* |
|                                     |     | Min-Max                    | Min-Max                             | Min-Max                     | Min-Max                             | Min-Max                   | Min-Max                             | Min-Max                     | Min-Max                             |
| Asian                               | 48  | 789.6 - 5,170.0            | 9.1 - 59.4                          | 352.0 - 2,060.0             | 9.0 - 103.0                         | 0.1 - 28.1                | 0.2 - 55.1                          | 0.3 - 10.1                  | 1.3 - 43.9                          |
| Beverages                           |     |                            |                                     |                             |                                     |                           |                                     |                             |                                     |
| Milkshakes, smoothies               | 130 | 340.0 - 5,300.0            | 3.9 - 60.9                          | 2.0 - 1,040                 | 0.1 - 52.0                          | 8.7 - 199.0               | 17.1 - 390.2                        | 0.0 - 41.6                  | 0.0 - 180.9                         |
| Soft Drinks, sugar sweetened        | 72  | 193.0 - 1,390.0            | 2.2 - 16.0                          | 0.3 - 390.0                 | 0.0 - 19.5                          | 7.3 - 72.0                | 14.3 - 141.2                        | 0.0 - 4.2                   | 0.0 - 18.3                          |
| Soft Drinks, artificially sweetened | 24  | 3.0 - 139.00               | 0.0 - 1.6                           | 0.0 - 310.0                 | 0.0 - 15.5                          | 0.0 - 0.3                 | 0.0 - 0.6                           | 0.0 - 3.3                   | 0.0 - 14.4                          |
| Breakfast, savoury                  | 36  | 571.0 - 3,300.0            | 6.6 - 37.9                          | 11.0 - 2,080.0              | 0.6 - 178.7                         | 0.3 - 36.6                | 0.6 - 71.8                          | 0.7 - 27.2                  | 3.0 - 221.7                         |
| Pastry, savoury                     | 88  | 506.0 - 2,639.0            | 5.8 - 30.3                          | 33.3 - 1,850.0              | 1.7 - 92.5                          | 0.2 - 12.2                | 0.4 - 23.9                          | 2.2 - 23.0                  | 9.6 - 109.4                         |
| Cakes, muffins and pastry           | 315 | 436.0 - 7,079.0            | 5.0 - 81.4                          | 3.0 - 1,600.0               | 0.2 - 80.0                          | 3.1 - 183.0               | 3.9 - 358.8                         | 0.5 - 43.0                  | 1.9 - 187.0                         |
| Desserts                            | 75  | 189.0 - 10,099.0           | 2.2 - 116.1                         | 4.0 - 1,504.0               | 0.2 - 75.2                          | 4.7 - 302.0               | 9.2 - 592.2                         | 0.1 - 36.6                  | 0.0 - 159.1                         |
| Burgers                             | 149 | 1,080.0 - 8,970.0          | 12.4 - 103.1                        | 415.0 - 3,069.4             | 19.8 - 172.0                        | 2.6 - 39.3                | 5.1 - 77.1                          | 1.7 - 73.6                  | 4.4 - 320.0                         |
| Chicken                             | 63  | 57.0 - 4,960.0             | 0.7 - 57.0                          | 47.0 - 3,040.0              | 2.4 - 204.1                         | 0.0 - 13.3                | 0.0 - 53.0                          | 0.1 - 21.2                  | 0.4 - 138.0                         |
| Pizza                               | 416 | 451.0 - 2,972.0            | 5.2 - 34.2                          | 133.0 - 1,306.0             | 6.7 - 159.9                         | 0.7 - 15.8                | 1.4 - 58.8                          | 0.2 - 13.8                  | 0.8 - 127.8                         |
| Salads                              | 59  | 70.0 - 2,750.0             | 0.8 - 31.6                          | 6.0 - 1,950.0               | 0.2 - 168.5                         | 0.6 - 31.6                | 1.2 - 66.9                          | 0.0 - 15.0                  | 0.0 - 108.5                         |
| Sandwiches and wraps                | 113 | 702.0 - 3,550.0            | 8.1 - 40.8                          | 165.0 - 2,460.0             | 8.0 - 222.5                         | 0.7 - 15.9                | 1.4 - 51.6                          | 0.4 - 25.9                  | 0.9 - 117.4                         |
| Fries                               | 25  | 806.0 - 6,350              | 9.3 - 73.0                          | 101.0 - 2,562.0             | 5.1 - 128.8                         | 0.0 - 62.4                | 0.0 - 122.4                         | 1.0 - 14.0                  | 4.4 - 60.9                          |
| Sides, other                        | 52  | 7.0 - 5,724.0              | 0.1 - 65.8                          | 1.0 - 3,218.4               | 0.1 - 160.9                         | 0.0 - 59.4                | 0.0 - 116.5                         | 0.0 - 44.6                  | 0.0 - 193.9                         |
| Dressings/condiments, savoury       | 88  | 23.0 - 955.0               | 0.3 - 11.0                          | 23.5 - 974.0                | 0.6 - 48.7                          | 0.0 - 15.3                | 0.0 - 30.0                          | 0.0 - 7.4                   | 0.0 - 32.2                          |

\*Percentage calculated having as reference the recommended adult average daily energy intake (8700 kilojoules/day), sodium intake (2000 mg/day), free sugars intake (maximum 51g/day based on 8700kJ), saturated fat intake (maximum of 23g/day based on 8700kJ). **Missing (n) Nutrient content and % of daily recommendation:** Asian (11); Milkshakes, smoothies (0); Soft drinks-sugar sweetened (1); Soft drinks-artificially sweetened (0); Breakfast-savoury (0); Pastry-savoury (0); Cakes, muffins and pastry (0); Desserts (0); Burgers (0); Chicken (6); Pizza (1); Salads (0); Sandwiches and wraps (0); Fries (0); Sides, other (0); Dressings/condiments-savoury (0)

**Supplementary Table S2.** NZ fast food supply 2020, by meal combo: Minimum and maximum energy, sodium, total sugar and saturated fat content per serving and percentage contribution to recommended daily intakes of energy, sodium, sugar and saturated fat.

| Types of fast food combos                    | N  | Energy- Kilojoules/serving |                                     | Sodium- milligrams/ serving |                                     | Total sugar-grams/serving |                                     | Saturated fat-grams/serving |                                     |
|----------------------------------------------|----|----------------------------|-------------------------------------|-----------------------------|-------------------------------------|---------------------------|-------------------------------------|-----------------------------|-------------------------------------|
|                                              |    | Content                    | Percentage of daily recommendation* | Content                     | Percentage of daily recommendation* | Content                   | Percentage of daily recommendation* | Content                     | Percentage of daily recommendation* |
|                                              |    | Min-Max                    | Min-Max                             | Min-Max                     | Min-Max                             | Min-Max                   | Min-Max                             | Min-Max                     | Min-Max                             |
| Burger(s), fries, drink-SSB                  | 20 | 2,809.0 – 6,434.0          | 32.3 – 74.0                         | 652.1 – 2,794.0             | 32.6 – 139.7                        | 28.4 – 71.1               | 55.7 – 139.4                        | 3.2 – 28.1                  | 13.9 – 122.2                        |
| Burger(s), fries, drink-ASB                  | 20 | 2,330.0 – 5,666.0          | 26.8 – 65.1                         | 679.0 – 2,816.5             | 34.0 – 140.8                        | 4.1 – 16.3                | 8.0 – 32.0                          | 3.2 – 67.9                  | 13.9 – 295.2                        |
| Burger(s), fries, dessert, drink-SSB         | 9  | 5,421.0 – 8,609.0          | 62.3 – 98.95                        | 1,517.0 – 2,630.0           | 75.9 – 131.5                        | 65.0 – 91.8               | 127.5 – 180.0                       | 8.5 – 50.2                  | 37.0 – 218.3                        |
| Burger(s), fries, dessert, drink-ASB         | 9  | 4,653.0 – 7,841.0          | 53.5 – 90.1                         | 1,537.0 – 2,650.0           | 76.9 – 132.5                        | 30.9 – 46.2               | 60.6 – 90.6                         | 8.5 – 50.2                  | 37.0 – 218.3                        |
| Chicken, fries, drink-SSB                    | 3  | 3,343.0 – 4,858.0          | 38.4 – 55.84                        | 1,353.0 – 1,996.5           | 67.7 – 99.8                         | 39.1 – 52.5               | 76.7 – 102.9                        | 3.4 – 9.2                   | 14.8 – 40.0                         |
| Chicken, fries, drink-ASB                    | 3  | 2,539.8 – 4,189.2          | 29.2 – 48.2                         | 1,375.5 – 2,052.8           | 68.8 – 102.6                        | 0.1 – 4.8                 | 0.2 – 9.4                           | 3.4 – 9.2                   | 14.8 – 40.0                         |
| Chicken, fries or potato, dessert, drink-SSB | 10 | 2,980.0 – 8,193.0          | 34.3 – 94.2                         | 1,171.0 – 3,068.0           | 58.6 – 153.4                        | 41.0 – 66.9               | 80.4 – 131.2                        | 6.2 – 29.6                  | 27.0 – 128.7                        |
| Chicken, fries or potato, dessert, drink-ASB | 10 | 2,395.0 – 7,425.0          | 27.5 – 85.3                         | 1,174.0 – 3,088.0           | 58.7 – 154.4                        | 6.0 – 21.3                | 11.8 – 41.8                         | 6.2 – 29.6                  | 27.0 – 128.7                        |
| Sandwich, fries, drink-SSB                   | 6  | 3,249 – 4,202.9            | 37.3 – 48.3                         | 771.0 – 1,610.6             | 38.6 – 80.5                         | 49.6 – 55.4               | 97.3 – 108.6                        | 2.8 – 8.5                   | 12.2 – 37.0                         |
| Sandwich, fries, drink-ASB                   | 6  | 2,445.8 – 3,399.7          | 28.1 – 39.1                         | 793.5 – 1,633.1             | 39.7 – 81.66                        | 1.9 – 7.7                 | 3.7 – 15.1                          | 2.8 – 8.5                   | 12.2 – 37.0                         |
| Pizza(s), Side(s)                            | 13 | 2,505.6 – 4,138.0          | 28.8 – 47.6                         | 728.0 – 1,750.0             | 36.4 – 87.5                         | 8.9 – 50.8                | 17.5 – 99.6                         | 8.0 – 16.9                  | 34.8 – 73.5                         |
| Pizza(s), Side(s), Drink-SSB                 | 5  | 4,249.0 – 4,765.0          | 48.8 – 54.8                         | 711.0 – 1,272.0             | 35.6 – 63.6                         | 71.9 – 84.5               | 141.0 – 165.7                       | 10.5 – 16.9                 | 45.7 – 73.5                         |
| Pizza(s), Side(s), Drink-ASB                 | 5  | 3,659.6 – 4,175.6          | 42.0 – 48.0                         | 714.3 – 1,275.3             | 35.7 – 63.8                         | 36.9 – 49.5)              | 72.4 – 97.1                         | 10.5 – 16.9                 | 45.7 – 73.5                         |

|                                                       |            |                       |                   |                      |                   |                  |                    |                 |                    |
|-------------------------------------------------------|------------|-----------------------|-------------------|----------------------|-------------------|------------------|--------------------|-----------------|--------------------|
| Pie, side (optional), drink-SSB                       | 4          | 3,697.0 – 4,627.0     | 42.5 – 53.2       | 881.0 – 1,400.0      | 44.1 – 70.0       | 47.4 – 67.1      | 92.9 – 131.6       | 8.0 – 31.2      | 34.8 – 135.7       |
| Pie, side (optional), drink-ASB                       | 4          | 2,946.0 – 3,876.0     | 33.9 – 44.6       | 902.0 – 1,421.0      | 45.1 – 71.1       | 2.4 – 22.1       | 4.7 – 43.3         | 8.0 – 31.2      | 34.8 – 135.7       |
| Breakfast                                             | 3          | 4,051.0 – 4,861.0     | 46.6 – 55.9       | 1,993.0 – 2,422.0    | 99.7 – 121.1      | 28.6 – 30.6      | 56.1 – 60.0        | 10.9 – 20.1     | 47.4 – 87.4        |
| Salad or wrap, smoothie                               | 3          | 1,800.0 – 4,539.0     | 20.7 – 52.2       | 362.0 – 1,021.0      | 18.1 – 51.1       | 47.2 – 56.7      | 92.6 – 111.2       | 1.8 – 15.5      | 7.8 – 67.4         |
| Burger or chicken and fries                           | 3          | 2,422.0 – 3,488.2     | 27.8 – 40.1       | 1,125.0 – 1,566.0    | 56.3 – 78.3       | 0.0 – 7.3        | 0.0 – 14.3         | 6.8 – 9.7       | 29.6 – 42.2        |
| Chicken, potato, fries, additional item**, drink-SSB  | 20         | 4,971.1 – 7,774.1     | 57.1 – 89.4       | 2,194.0 – 3,936.0    | 109.7 – 196.8     | 57.3 – 101.2     | 112.4 – 198.4      | 6.2 – 17.0      | 27.0 – 73.9        |
| Chicken, potato, fries, additional item***, drink-ASB | 20         | 4,167.9 – 6,970.9     | 47.9 – 80.1       | 2,216.5 – 3,958.5    | 110.8 – 197.9     | 9.6 – 53.5       | 18.8 – 104.9       | 6.2 – 17.0      | 27.0 – 73.9        |
| <b>Total</b>                                          | <b>176</b> | <b>1,800-8,609.00</b> | <b>20.7-98.95</b> | <b>362.0-3,958.5</b> | <b>18.1-197.9</b> | <b>0.0-101.2</b> | <b>0.0 – 198.4</b> | <b>1.8-67.9</b> | <b>7.8 – 295.2</b> |

SSB: sugar sweetened beverage, ASB: artificially sweetened beverage

\*Percentage calculated having as reference the recommended adult average daily energy intake (8700 kilojoules/day), sodium intake (2000 mg/day), free sugars intake (maximum 51g/day based on 8700kJ), saturated fat intake (maximum of 23g/day based on 8700kJ).

\*\* Burger, sandwich, bread roll or coleslaw.
